# Supplementary material for: Celecoxib for the Prevention of Colorectal Adenomatous Polyps
Source: Atypon-hosted journal article supplement (doi:10.1056/nejmoa061652), 2006-08-30
Supplement: nejm_arber_885sa1.pdf [file nejm_arber_885sa1.pdf]

## Supplementary Appendix

This appendix has been provided by the authors to give readers additional information about their work.

Supplement to: Arber N, Eagle CJ, Spicak J, et al. Celecoxib for the prevention of colorectal adenomatous polyps. *N Engl J Med* 2006;355:885-95.

---

**Supplementary Appendix 1**

---

| <b>Study Time Point</b>       | <b>Placebo<br/>(N = 627)</b> | <b>Celecoxib<br/>(N = 933)</b> |
|-------------------------------|------------------------------|--------------------------------|
| Baseline                      |                              |                                |
| Subjects — n (%)              | 598 (95.4)                   | 895 (95.9)                     |
| Mean — % (SE)                 | 42.1 (0.15)                  | 42.1 (0.13)                    |
| Median — % (Minimum, Maximum) | 42.0 (27.0, 52.0)            | 42.0 (28.0, 53.0)              |
| Year 1                        |                              |                                |
| Subjects — n (%)              | 554 (88.4)                   | 823 (88.2)                     |
| Mean — % (SE)                 | 43.9 (0.16)                  | 43.8 (0.15)                    |
| Median — % (Minimum, Maximum) | 44.0 (30.0, 58.0)            | 44.0 (29.0, 56.0)              |
| Year 3                        |                              |                                |
| Subjects — n (%)              | 475 (75.8)                   | 703 (75.3)                     |
| Mean — % (SE)                 | 44.2 (0.18)                  | 44.1 (0.15)                    |
| Median — % (Minimum, Maximum) | 44.0 (31.6, 59.0)            | 44.0 (26.0, 55.0)              |

---

## Supplementary Appendix 2

| <i>MedDRA</i> Systems Organ Class                                 | Placebo<br>Number (%)<br>(N = 627) | Celecoxib<br>400 mg Daily<br>Number (%)<br>(N = 933) |
|-------------------------------------------------------------------|------------------------------------|------------------------------------------------------|
| Blood and lymphatic system disorders <sup>1</sup>                 | 2 (0.3)                            | 3 (0.3)                                              |
| Cardiac disorders <sup>2</sup>                                    | 16 (2.6)                           | 38 (4.1)                                             |
| Congenital, familial and genetic disorders <sup>3</sup>           | 0 (0.0)                            | 1 (0.1)                                              |
| Ear and labyrinth disorders <sup>4</sup>                          | 1 (0.2)                            | 0 (0.0)                                              |
| Endocrine disorders <sup>5</sup>                                  | 0 (0.0)                            | 1 (0.1)                                              |
| Eye disorders <sup>6</sup>                                        | 0 (0.0)                            | 5 (0.5)                                              |
| Gastrointestinal disorders <sup>7</sup>                           | 22 (3.5)                           | 33 (3.5)                                             |
| General disorders and administration site conditions <sup>8</sup> | 8 (1.3)                            | 14 (1.5)                                             |
| Hepatobiliary disorders <sup>9</sup>                              | 6 (1.0)                            | 3 (0.3)                                              |
| Immune system disorders <sup>10</sup>                             | 1 (0.2)                            | 0 (0.0)                                              |
| Infections and infestations <sup>11</sup>                         | 11 (1.8)                           | 18 (1.9)                                             |
| Injury, poisoning, and procedural complications <sup>12</sup>     | 7 (1.1)                            | 13 (1.4)                                             |
| Investigations <sup>13</sup>                                      | 3 (0.5)                            | 3 (0.3)                                              |
| Metabolism and nutrition disorders <sup>14</sup>                  | 4 (0.6)                            | 3 (0.3)                                              |
| Musculoskeletal and connective tissue disorders <sup>15</sup>     | 7 (1.1)                            | 11 (1.2)                                             |
| Neoplasms, benign, malignant, and unspecified <sup>16</sup>       | 18 (2.9)                           | 34 (3.6)                                             |
| Nervous system disorders <sup>17</sup>                            | 18 (2.9)                           | 19 (2.0)                                             |
| Pregnancy, puerperium, and perinatal conditions <sup>18</sup>     | 0 (0.0)                            | 1 (0.1)                                              |
| Psychiatric disorders <sup>19</sup>                               | 1 (0.2)                            | 2 (0.2)                                              |
| Renal and urinary disorders <sup>20</sup>                         | 3 (0.5)                            | 10 (1.1)                                             |
| Reproductive system and breast disorders <sup>21</sup>            | 4 (0.6)                            | 5 (0.5)                                              |
| Respiratory, thoracic and mediastinal disorders <sup>22</sup>     | 5 (0.8)                            | 13 (1.4)                                             |
| Skin and subcutaneous tissue disorders <sup>23</sup>              | 0 (0.0)                            | 4 (0.4)                                              |
| Surgical and medical procedures <sup>24</sup>                     | 18 (2.9)                           | 22 (2.4)                                             |
| Vascular disorders <sup>25</sup>                                  | 6 (1.0)                            | 13 (1.4)                                             |

Note: Events were classified using *MedDRA* systems organ class (SOC) for all SOCs for which there were data. The individual adverse events (preferred terms) reported in each SOC are included in the footnotes. If a given subject had two or more adverse events in a particular SOC, then the subject contributed once for that SOC to this count. No differences between groups were statistically significant.

<sup>1</sup> Blood and lymphatic system disorders: anemia, lymphadenopathy, thrombocytopenia.

<sup>2</sup> Cardiac disorders: acute myocardial infarction; angina pectoris; angina, unstable; aortic valve stenosis; arrhythmia; atrial fibrillation; atrioventricular block; cardiac failure; cardiac failure, congestive; cardiogenic shock; coronary artery disease; myocardial infarction; myocardial ischemia; palpitations; sick sinus syndrome; ventricular tachycardia.

<sup>3</sup> Congenital, familial, and genetic disorders: coarctation of the aorta.

<sup>4</sup> Ear and labyrinth disorders: vertigo.

<sup>5</sup> Endocrine disorders: thyroid disorder.

<sup>6</sup> Eye disorders: blindness, unilateral; endophthalmitis; retinal hemorrhage; retinal vein thrombosis; ulcerative keratitis; vision, blurred.

<sup>7</sup> Gastrointestinal disorders: abdominal discomfort; abdominal distension; abdominal hernia; abdominal pain; abdominal pain, lower; abdominal pain, upper; anal fistula; ascites; colonic hemorrhage; colonic polyp; constipation; diarrhea; duodenal ulcer; duodenal ulcer, perforation; dyspepsia; dysphagia; enterovesical fistula; erosive duodenitis; fecal incontinence; feces, discolored; gastric outlet obstruction; gastric ulcer; gastritis; gastritis, erosive; gastroduodenal ulcer; gastrointestinal hemorrhage; gastroesophageal reflux disease; hematemesis; hematochezia; hemorrhoidal hemorrhage; hemorrhoids; hiatus hernia; ileus, paralytic; inguinal hernia; intestinal obstruction; large intestine perforation; melena; nausea; esophageal stenosis; esophagitis; pancreatitis, peptic ulcer; rectal hemorrhage; reflux esophagitis; stomatitis; umbilical hernia; vomiting.

8 General disorders and administration site conditions: chest discomfort; chest pain; condition, aggravated; cyst;  
death; fatigue; no adverse effect; noncardiac chest pain; edema; pyrexia; sudden death; ulcer.

9 Hepatobiliary disorders: biliary colic; cholecystitis; cholecystitis, acute; cholelithiasis; hepatic cirrhosis; hepatic  
failure; hepatic steatosis.

10 Immune system disorders: anaphylactic shock.

11 Infections and infestations: abscess, appendicitis, bronchitis, bronchopneumonia, cellulitis, cestode infection,  
erysipelas, Escherichia sepsis, gangrene, gastroenteritis, helicobacter infection, herpes zoster, infected  
sebaceous cyst, infection, infectious mononucleosis, liver abscess, perianal abscess, pneumonia, pyelonephritis,  
sepsis, urethritis, urinary tract infection, wound infection.

12 Injury, poisoning, and procedural complications: animal bite; ankle fracture; concussion; dislocation of vertebra;  
fall; fibula fracture; foot fracture; fracture; head injury; injury; joint dislocation; limb, traumatic amputation; lower  
limb fracture; muscle injury; postprocedural complication; postprocedural hemorrhage; rib fracture; road traffic  
accident; tendon rupture; tibia fracture.

13 Investigations: arteriogram, coronary; blood creatinine, increased; catheterization, cardiac; hemoglobin,  
decreased; liver function test, abnormal; physical examination, normal.

14 Metabolism and nutrition disorders: anorexia; dehydration; diabetes mellitus; diabetes mellitus, insulin-  
dependent; gout; hypoglycemia; metabolic acidosis.

15 Musculoskeletal and connective tissue disorders: arthralgia, back pain, bone disorder, bone pain, bursitis,  
intervertebral disc degeneration, intervertebral disc disorder, intervertebral disc protrusion, muscular weakness,  
osteoarthritis, pain in extremity, rotator cuff syndrome.

16 Neoplasms, benign, malignant, and unspecified (including cysts and polyps): adrenal neoplasm; benign laryngeal  
neoplasm; benign neoplasm; benign neoplasm of testis; benign ovarian tumor; bile duct cancer; bladder cancer;  
brain neoplasm; breast cancer, female; chondroma; colon cancer; colorectal cancer; endometrial cancer; gastric  
cancer; hemangioma; hepatic neoplasm; Hodgkin's disease; leiomyoma; lung neoplasm, malignant;  
meningioma; multiple myeloma; neoplasm recurrence; esophageal carcinoma; prostate cancer; prostate cancer,  
stage I; prostatic adenoma; renal cell carcinoma, stage II; small cell lung cancer, stage unspecified; thyroid  
adenoma; uterine cancer; uterine leiomyoma; Waldenström's macroglobulinemia.

17 Nervous system disorders: carotid artery stenosis; carpal tunnel syndrome; cerebral infarction; cerebrovascular  
accident; cerebrovascular disorder; convulsion; coordination, abnormal; dementia; demyelination; dizziness;  
dyskinesia; epilepsy; headache; hemiparesis; hemiplegia, transient; ischemic stroke; loss of consciousness;  
nerve compression; syncope; syncope, vasovagal; transient ischemic attack; vertebrobasilar insufficiency.

18 Pregnancy, puerperium, and perinatal conditions: pregnancy.

19 Psychiatric disorders: confusional state; mood, altered; psychotic disorder.

20 Renal and urinary disorders: hematuria; nephrolithiasis; nephropathy; nephrotic syndrome; renal failure; renal  
failure, acute; renal impairment; urethral stricture; urinary incontinence; urinary retention.

21 Reproductive system and breast disorders: benign prostatic hyperplasia; breast pain; galactorrhea; metrorrhagia;  
edema, genital; pelvic pain; phimosis.

22 Respiratory, thoracic, and mediastinal disorders: choking; chronic obstructive pulmonary disease; dyspnea;  
hemoptysis; pleural effusion; pneumothorax; pulmonary embolism; pulmonary microemboli; pulmonary edema;  
sleep apnea syndrome.

23 Skin and subcutaneous tissue disorders: dermatitis; dermatitis, allergic; skin ulcer; urticaria.

24 Surgical and medical procedures: angioplasty, arterial aneurysm repair, arthrodesis, cardiac pacemaker  
insertion, carpal tunnel decompression, cataract operation, cholecystectomy, colectomy, coronary artery surgery,  
hemorrhoid operation, hip arthroplasty, hysterectomy, inguinal hernia repair, knee arthroplasty, liposuction,  
mastectomy, middle ear lesion excision, nephrectomy, prostatic operation, spinal laminectomy, surgery,  
transurethral prostatectomy, umbilical hernia repair.

25 Vascular disorders: angiopathy, aortic aneurysm, aortic thrombosis, arterial occlusive disease, arterial rupture,  
circulatory collapse, deep vein thrombosis, hemorrhage, hypertension, hypertensive crisis, orthostatic  
hypotension, peripheral artery aneurysm, thrombosis, varicose ulceration, venous thrombosis.
